# Supplementary material for: Spatially controlled tenascin-C accumulation contributes to inflammatory disease persistence in giant cell aortitis
Source: JCI journal article supplement (doi:10.1172/jci.insight.200255), 2026-04-08

Full unedited blot for Figure 4D

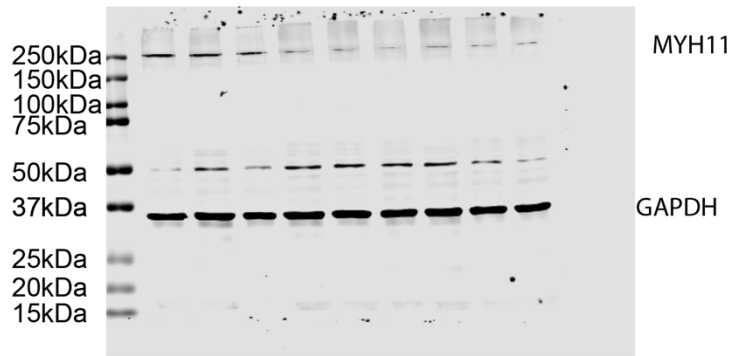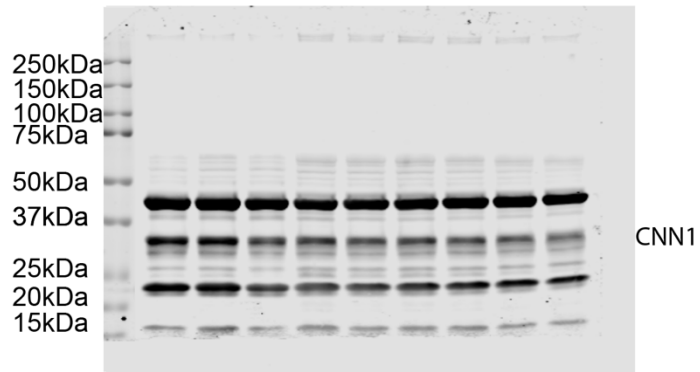

Full unedited blot for Figure 4G

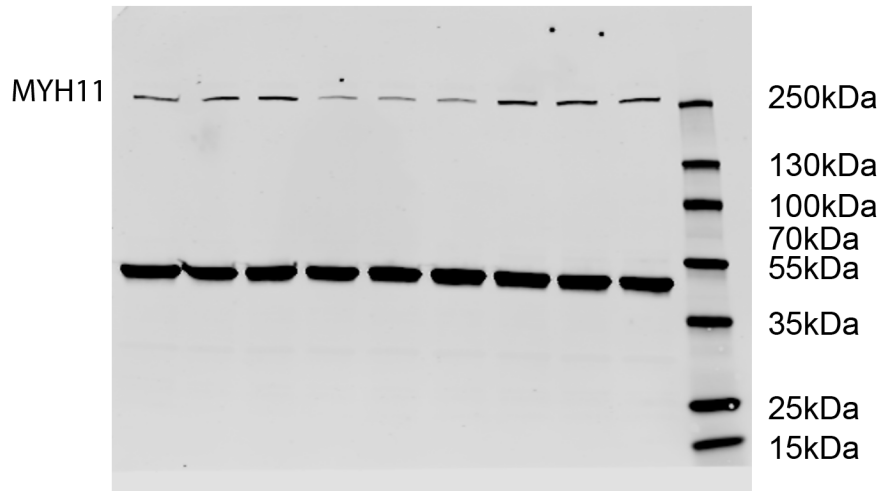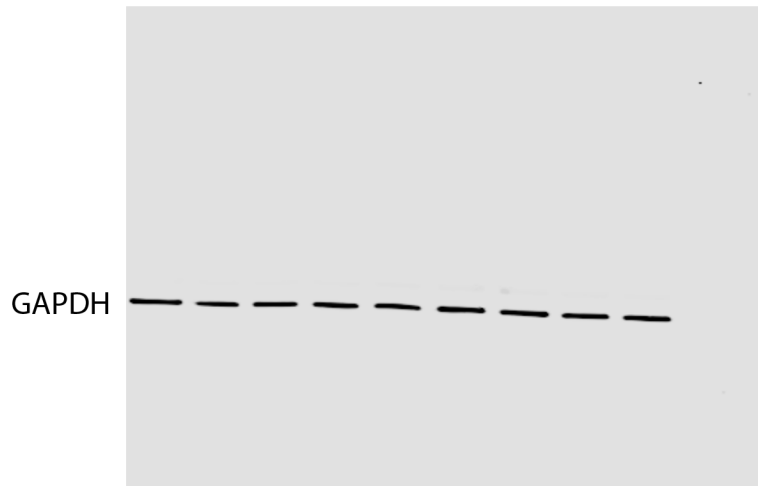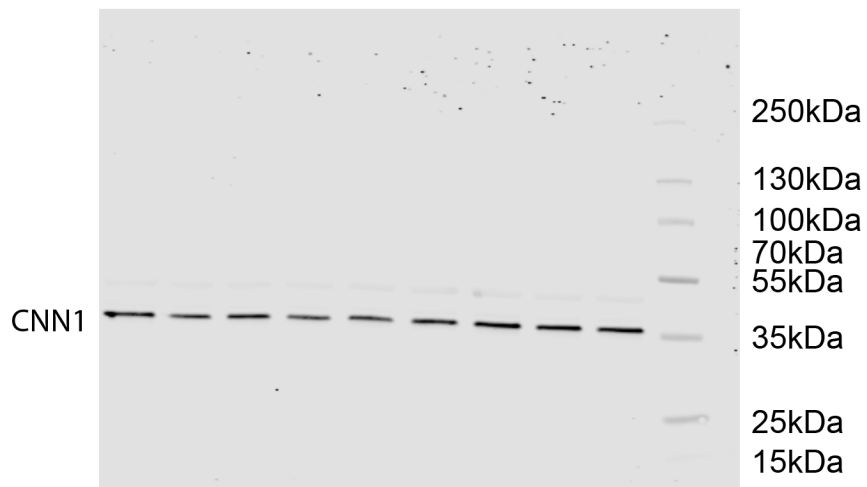

Full unedited blot for Figure 4H

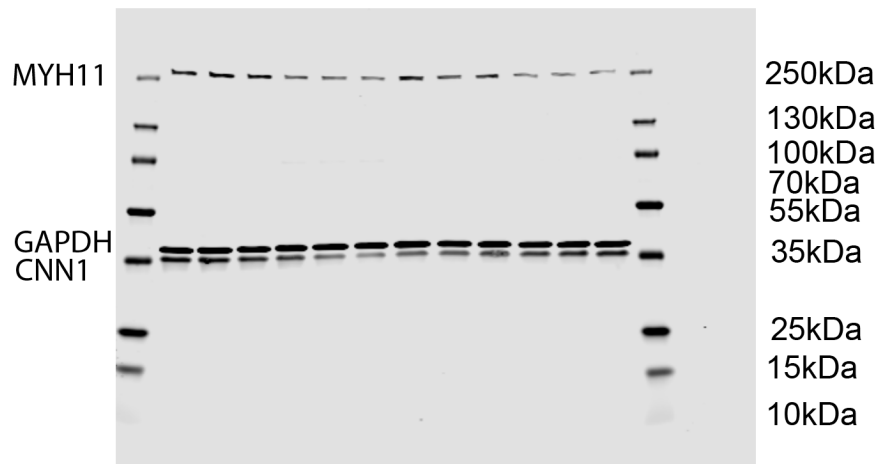

Full unedited blot for Supplemental Figure 3D

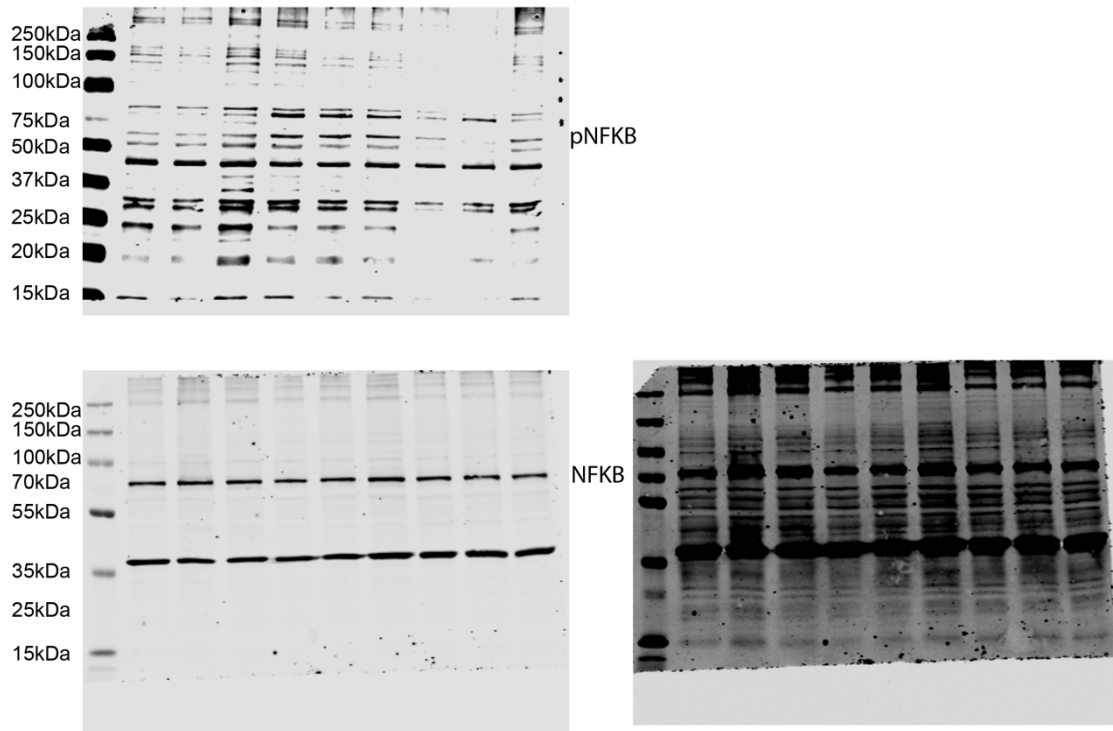

Full unedited blot for Supplemental Figure 3E

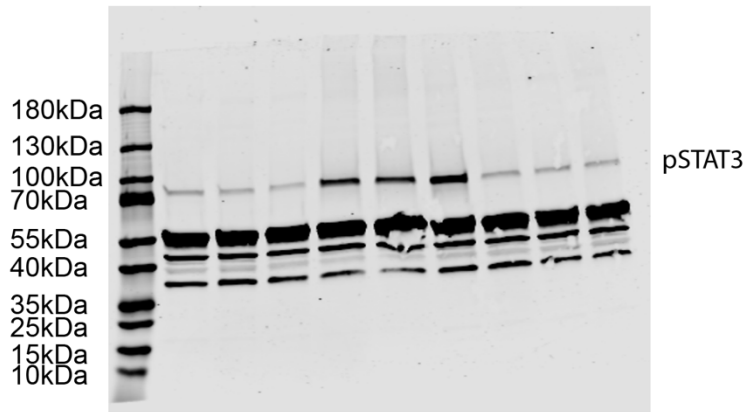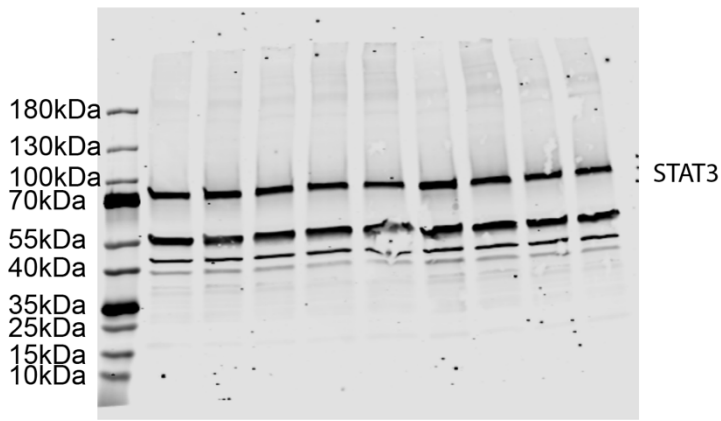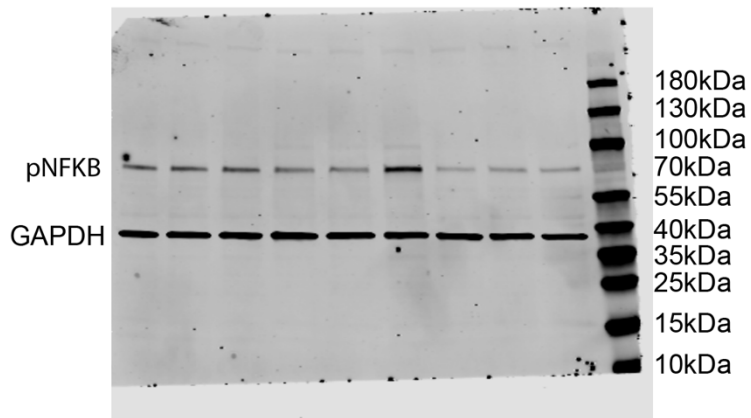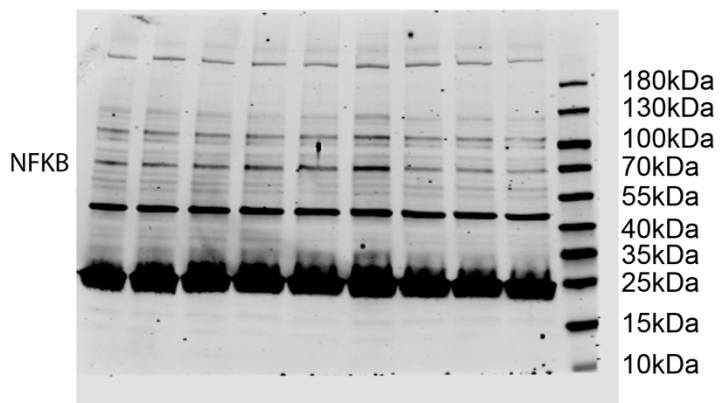

Full unedited blot for Supplemental Figure 3F

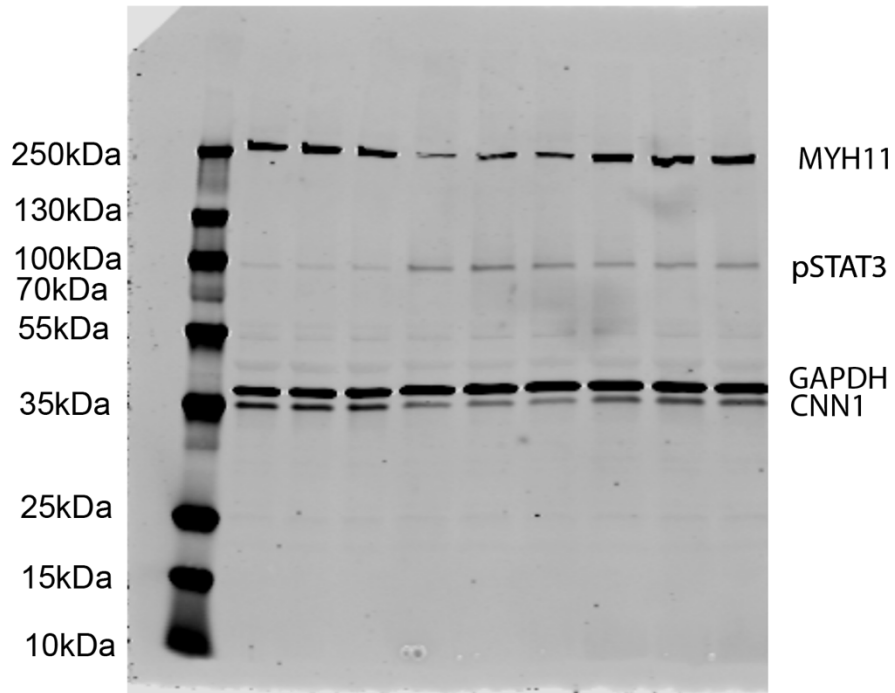

STAT3

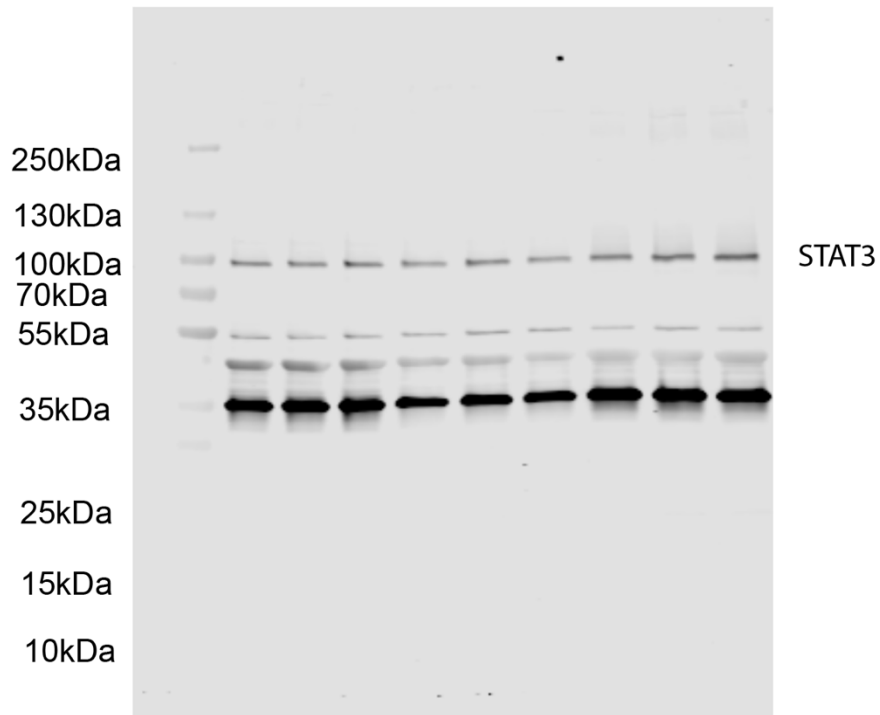

Supplement: sd3 [file 3]
